# Supplementary material for: Perceptions of Healthcare Workers on the Electronic Health Record System of Sexually Transmitted Disease Clinics in Sri Lanka: A Descriptive Cross-sectional Study
Source: Research Square preprint supplement (doi:10.21203/rs.3.rs-7944155/v1), 2025-11-28
Supplement: Supplementary file 1 [file 4cc83f9643da33d3f037e465.docx]

**Study Questionnaire**

Dear respondent,

Thank you for agreeing to participate in this survey.

This is a questionnaire for the study on “Perceptions of healthcare workers on the Electronic Information Management System (EIMS) of STD clinics in Sri Lanka” done by Dr. H.A.D.P. Nimalrathna (MD trainee in Venereology). If you would like to consent to this study, you may fill and submit this questionnaire using about 5 to 10 minutes of your valuable time and it will help us to improve the current electronic information management system.

**SECTION A: SOCIO-DEMOGRAPHIC AND OCCUPATION-RELATED CHARACTERISTICS**

- - 1. **Age** at last birthday ………………………..
    2. What is your **sex**?
       1. Male
       2. Female
    3. What is your **marital status**?
       1. Married
       2. Never married
       3. Other
    4. What is your **mother language**?
       1. Sinhala
       2. English
       3. Tamil
       4. other
    5. What is the **highest educational qualification** you have achieved?
       1. Passed G.C.E O/L
       2. Passed G.C.E A/L
       3. Completed a certificate course/technical course/diploma
       4. Completed degree
       5. Completed postgraduate course
       6. Other (please specify) …………………………….
    6. What is the **highest Information technology (IT) qualification** you have achieved??
       1. None
       2. Passed IT as a subject in GCE O/L
       3. Pass IT as a subject in GCE A/L
       4. Completed certificate course / Diploma in IT
       5. Degree in IT
       6. Other: (please specify) …………………………….
    7. Have you ever used any electronic information management platform in patient care **other than EIMS used in the STD clinic?** (ex – HHMIS -Hospital health information management system, etc.)
       1. Yes
       2. No
    8. If yes – how long have you used that?

(If no, please skip this question)

…………………………

- - 1. What is your **current designation** in the STD clinic?
       1. Doctor
       2. Medical laboratory technician
       3. Nursing officer
       4. Pharmacist
       5. Public health Inspector
       6. Public health Nursing sister
       7. Public health Laboratory Technician
    2. What is your **role in EIMS**? (More than one can be selected)
       1. Patient registration
       2. STD Medical consultation
       3. HIV medical consultation
       4. Laboratory - Medical laboratory technician
       5. Laboratory - Microscopy
       6. Bleeding Nursing officer
       7. Drug dispensing
       8. Statistics generation
       9. Other (please specify) …………………………….
    3. **How long have you been working in a STD clinic** throughout your service?

………………………….

- - 1. Have you received **training on currently using EIMS** in the STD clinic setup?
       1. Yes
       2. No

**SECTION D- IMPACTS OF EIMS IN PATIENT CARE**

- - 1. In your opinion, how does the EIMS affect effective **communication** between the service receiver and the provider?
       1. Has a negative impact
       2. Has a positive impact
       3. No impact
    2. In your opinion, how does the EIMS affect **the maintenance of the confidentiality** of data?
       1. EIMS causes difficulty in maintaining the confidentiality of data
       2. EIMS makes it easy to maintain the confidentiality of data
       3. Doesn’t affect the maintenance of the confidentiality of data
    3. In your opinion, how does EIMS affect **errors** in patient care?
       1. EIMS causes more errors
       2. EIMS causes fewer errors
       3. No impact on errors
    4. In your opinion, how does the EIMS impact **work efficiency**?
       1. Increases work efficiency
       2. Decreases work efficiency
       3. Has no impact on work efficiency

**SECTION E - BARRIERS FOR SUCCESSFUL IMPLEMENTATION OF EIMS IN THE CURRENT SETUP**

- - 1. Do you encounter **technical difficulties** in your clinic setup? (ex- Internet interruptions/ Slow connection)
       1. Yes
       2. No
    2. Do you find **adequate facilities** for use EIMS in your clinic setup? (ex- number of computers, bar code readers, printers)
       1. Yes
       2. No
    3. Do you think your **computer literacy** is adequate to use EIMS effectively?
       1. Yes
       2. No
    4. Do you think that you have **adequate training** on EIMS to use it effectively?
       1. Yes
       2. No
    5. Do you think your **English literacy** is adequate to use the EIMS effectively?
       1. Yes
       2. No
    6. Do you think a **higher workload/ inadequate staff** makes it difficult to use EIMS?
       1. Yes
       2. No

**SECTION F - AREAS FOR FURTHER IMPROVEMENT**

- - 1. As you think, which of the following **areas in the EIMS needs further improvement**? (Mark all responses that you think are relevant)
       1. Content
       2. Format
       3. System speed
       4. Clinic Setup (ex-, seating arrangement, space)
       5. Training in EIMS
       6. Involvement of user ideas during EIMS development
       7. Availability of a skilled supporter on-site
       8. Continuous technical support from the SIM unit
    2. If you have any **suggestions to further improve** the EIMS, please mention them.

………………………………………………………………………………………..

………………………………………………………………………………………..

………………………………………………………………………………………..

………………………………………………………………………………………..

………………………………………………………………………………………..
