# Supplementary material for: Perceptions of Healthcare Workers on the Electronic Health Record System of Sexually Transmitted Disease Clinics in Sri Lanka: A Descriptive Cross-sectional Study
Source: Research Square preprint supplement (doi:10.21203/rs.3.rs-7944155/v1), 2025-11-28
Supplement: Supplementary file 2 [file b4428fcd3dc97bf3ff78a00b.xlsx]

## Sheet: Final Dataset Coded R12
serial number	Clinic	Age_Q1	Sex_Q2	Maritalst_Q3	MotherLang_Q4	EducationalQuali_Q5	ITQuali_Q6	UsedOtherPlatform_Q7	MonthsUseOtherPlatform_Q8	Designation_Q9	PatientRegistration_Q10	STDconsutaion_Q10	HIVconsultaion_Q10	LaboratoryMLT_Q10	LaboratoryMicroscopy_Q10	Bleeding_Q10	DrugDispening_Q10	StatisticsGeneration_Q10	OtherRole_Q10	YearsofService_Q11	TrainingOnEIMS_Q12	EffectiveCommunication_Q13	MaintainConfidentiality_Q14	AffectErrors_Q15	ImpactWorkefficiency_Q16	TechnicalDifficulties_Q17	AdequateFacilities_Q18	ComputerLiteracy_Q19	AdequateTraining_Q20	EnglishLiteracy_Q21	WorkLoadandStaffProblems_Q22	ImpContent_Q23	ImpFromat_Q23	ImpSystemSpeed_Q23	ImpClinicSetup_Q23	ImpTraining_Q23	ImpDuringDev_Q23	ImpSiteSupport_Q23	ImpTechSupport_Q23
1	galle	38	2	1	1	3	4	2	0	3	0	0	0	0	0	1	0	0	0	6	1	3	3	3	3	2	1	99	1	1	1	0	0	0	0	0	0	0	0
2	gampaha	34	2	1	1	3	4	1	60	4	0	0	0	0	0	0	1	0	0	3	99	3	3	3	3	3	3	3	3	1	3	0	0	1	0	0	0	0	0
3	mannar	36	1	1	1	4	4	2	0	2	0	0	0	1	0	0	0	0	0	1	2	2	2	3	3	2	2	1	1	1	1	0	0	1	1	1	0	0	0
4	colombo	54	1	1	1	2	1	2	0	3	0	0	0	0	0	1	0	0	0	18	2	3	3	1	1	2	2	2	2	1	2	0	1	1	0	1	1	1	0
5	colombo	50	2	1	1	4	4	2	0	3	0	0	0	0	0	1	0	0	0	17.1667	1	3	3	2	3	2	1	1	1	1	1	1	1	1	1	1	1	1	1
6	kaluthara	55	2	1	1	2	2	1	48	3	1	0	0	0	0	1	1	0	0	14	1	3	3	3	3	2	1	1	1	1	1	0	0	0	0	0	0	0	0
7	balapitiya	47	2	1	1	3	1	2	0	7	0	0	0	0	1	0	0	0	0	15	2	3	3	2	3	2	1	1	2	1	1	0	0	1	0	1	1	0	0
8	kaluthara	31	2	1	1	3	4	2	0	4	0	0	0	0	0	0	1	0	0	5	1	3	3	3	3	2	3	1	3	1	1	0	0	1	0	1	0	1	1
9	colombo	45	1	1	1	3	4	1	60	5	1	0	0	0	0	0	0	1	0	7	1	3	3	3	3	2	1	1	1	1	1	1	0	0	0	1	1	1	0
10	colombo	34	2	1	1	5	4	2	0	1	0	1	1	0	0	0	0	0	0	5	1	2	3	3	3	2	2	1	1	1	1	0	0	1	1	1	1	1	1
11	colombo	40	1	1	1	5	1	1	36	1	1	1	1	0	0	0	0	1	0	7	1	3	3	3	3	2	1	1	1	1	1	0	0	1	1	0	0	0	0
12	hambanthota	32	2	1	1	4	4	1	12	2	0	0	0	1	0	0	0	0	0	5	1	3	3	3	3	2	1	1	1	1	1	0	0	0	0	0	0	0	0
13	balapitiya	37	2	1	1	3	4	2	0	3	0	0	0	0	0	1	0	0	0	9	1	3	2	3	2	2	2	1	1	2	2	1	0	1	0	0	0	0	0
14	balapitiya	45	2	1	1	3	1	2	0	3	1	0	0	0	0	1	1	0	0	16	1	3	3	3	2	2	2	1	1	2	2	1	0	1	0	0	0	0	0
15	kurunegala	48	1	1	3	3	4	2	0	7	0	0	0	0	1	0	0	0	0	3.16667	2	3	3	3	3	2	1	1	2	1	1	0	0	1	0	0	0	1	0
16	colombo	36	1	1	1	4	1	2	0	5	1	0	0	0	0	0	0	1	0	10	1	2	3	2	3	2	1	1	1	1	1	1	1	1	1	1	1	1	1
17	kaluthara	38	1	2	1	4	4	2	0	2	0	0	0	1	0	0	0	0	0	6	2	3	3	2	3	1	2	1	1	1	1	0	0	0	0	1	0	0	0
18	kaluthara	50	2	1	1	4	1	1	12	1	0	1	1	0	0	0	0	0	0	3	1	3	3	3	3	2	1	1	1	1	2	0	0	1	0	0	0	0	1
19	kaluthara	55	2	1	1	3	1	1	36	3	1	0	0	0	0	1	0	0	0	10	1	2	3	3	3	2	1	1	1	1	1	0	0	1	1	0	1	1	0
20	colombo	33	2	1	1	4	2	1	36	4	0	0	0	0	0	0	1	0	0	4	1	2	2	1	3	2	1	3	2	1	1	0	1	1	0	1	1	1	0
21	colombo	45	2	1	1	3	4	2	0	3	1	0	0	0	0	1	1	0	0	17.0833	1	3	3	3	3	2	2	1	1	1	2	1	0	1	0	1	1	1	1
22	colombo	45	2	1	1	3	6	2	0	3	0	0	0	0	0	1	0	0	0	7.58333	1	2	1	3	1	2	1	1	1	1	2	1	1	1	1	1	1	1	1
23	matale	39	2	1	1	3	1	2	0	3	1	0	0	0	0	1	1	0	0	3	1	1	2	1	1	2	2	3	2	3	2	0	0	0	0	0	0	1	0
24	colombo	36	2	1	1	5	4	1	28	1	0	1	1	0	0	0	0	0	0	8	1	1	3	3	3	2	2	1	1	1	1	0	0	1	0	0	0	1	1
25	colombo	28	1	2	1	3	4	2	0	5	1	0	0	0	0	0	0	0	0	2.16667	1	3	3	3	3	2	2	1	2	2	1	0	0	1	0	1	0	1	1
26	colombo	37	2	1	1	5	4	2	0	1	0	1	1	0	0	0	0	0	0	4	2	3	3	3	3	2	2	1	2	1	2	0	0	1	0	1	1	1	1
27	colombo	37	1	1	1	4	1	1	30	1	0	1	1	0	0	0	0	0	0	2	1	1	3	3	3	2	2	1	1	1	2	1	1	1	0	0	1	1	1
28	colombo	45	2	1	1	5	1	1	2	1	0	1	1	0	0	0	0	0	1	15	1	3	3	3	3	2	2	1	2	1	1	1	0	1	0	1	1	1	1
29	colombo	35	1	1	1	5	1	2	0	1	0	1	1	0	0	0	0	0	0	6	1	1	2	3	1	2	1	1	1	1	2	1	0	1	0	0	0	1	0
30	colombo	35	2	1	1	5	4	1	36	1	0	1	1	0	0	0	0	0	0	1	1	3	3	3	3	2	1	1	1	1	1	0	0	1	0	0	0	0	0
31	colombo	29	1	1	1	3	3	2	0	5	1	0	0	0	0	0	0	0	0	3.5	1	3	3	3	3	2	1	1	1	1	2	0	0	1	0	0	0	0	0
32	colombo	39	2	1	1	5	1	2	0	1	0	1	1	0	0	0	0	1	0	9	1	3	2	2	1	2	2	1	1	1	2	1	0	1	0	0	1	1	0
33	colombo	40	2	1	1	5	1	2	0	1	0	1	0	0	0	0	0	0	0	6	1	1	3	3	1	2	2	3	2	1	2	1	1	1	1	1	1	1	1
34	colombo	34	2	1	1	5	4	1	24	1	0	0	1	0	0	0	0	0	0	5	1	3	3	3	1	2	1	1	1	1	2	0	0	0	0	1	0	0	0
35	mullativ	45	1	1	3	4	1	1	60	1	1	0	0	0	0	0	0	0	0	7	1	3	3	3	3	2	1	1	1	1	2	0	0	0	0	0	0	0	1
36	ragama	54	1	1	1	4	6	2	0	1	0	1	1	0	0	0	0	0	0	7	1	3	3	3	3	2	1	1	1	1	1	0	0	1	0	0	0	0	1
37	matale	42	2	1	1	4	1	2	0	1	0	1	1	0	0	0	0	0	0	3	1	1	3	1	1	2	1	2	2	1	1	0	0	1	1	1	0	1	0
38	matale	50	1	1	3	5	1	2	0	1	0	1	0	0	0	0	0	0	0	7	1	1	3	3	2	2	2	1	1	1	1	1	1	1	0	1	1	0	1
39	matale	40	2	1	1	4	4	2	0	1	0	1	1	0	0	0	0	1	0	10	1	1	2	1	1	2	2	1	1	1	1	0	0	1	0	0	0	0	0
40	kurunegala	50	2	1	1	5	1	2	0	1	0	1	1	0	0	0	0	0	0	3	1	3	3	3	3	2	2	1	1	1	1	0	0	0	0	0	0	0	0
41	badulla	38	2	1	1	3	1	2	0	3	1	0	0	0	0	1	0	0	0	5	2	3	3	2	3	2	2	1	2	1	2	0	0	0	0	1	0	0	1
42	panadura	56	2	1	1	3	1	1	24	7	0	0	0	0	1	0	0	0	0	9999	99	3	3	3	1	2	1	3	1	1	1	0	0	1	0	0	0	0	0
43	panadura	33	2	1	1	4	3	1	3	1	0	1	0	0	0	0	0	1	0	2	2	3	3	3	3	2	1	1	1	1	1	1	1	0	0	1	1	0	1
44	balapitiya	41	2	1	1	5	1	1	24	1	0	1	1	0	0	0	0	1	0	11	1	1	3	3	3	2	1	1	1	1	2	0	0	1	0	0	1	1	1
45	colombo	32	1	1	1	5	1	1	6	1	0	1	1	0	0	0	0	0	0	2.5	1	1	3	3	3	2	1	1	1	1	1	0	0	1	1	1	0	0	0
46	mathara	52	2	1	1	3	1	2	0	3	1	0	0	0	0	1	0	1	0	8	1	3	3	2	3	2	1	2	1	1	2	0	0	1	0	0	1	0	1
47	mathara	55	2	1	1	3	4	2	0	3	0	0	0	0	0	1	0	0	0	3	1	3	3	2	3	2	1	2	1	1	2	0	0	1	0	0	0	0	0
48	mathara	56	1	1	1	3	1	2	0	5	1	0	0	0	0	0	0	0	0	23	1	2	2	3	3	2	2	1	1	1	1	1	1	1	1	1	1	1	1
49	ragama	52	2	1	1	3	1	1	24	3	1	0	0	0	0	1	0	0	0	2	1	2	2	2	2	2	2	2	2	1	2	0	1	0	0	0	0	1	0
50	ragama	55	2	1	1	3	1	1	24	3	1	0	0	0	0	1	0	0	0	12	1	2	2	2	2	2	2	2	2	1	2	0	0	1	0	0	0	1	0
51	ragama	52	1	1	1	4	1	1	72	1	0	1	1	0	0	0	0	0	0	3	1	2	3	2	1	2	2	1	1	1	2	0	0	1	0	0	1	1	0
52	gampaha	45	1	1	1	2	1	2	0	7	0	0	0	0	1	0	0	0	0	6	1	2	2	2	1	2	2	1	3	1	2	0	0	0	0	0	0	0	0
53	kurunegala	49	1	1	1	3	4	2	0	5	1	0	0	0	0	0	0	1	0	5	2	2	3	2	3	2	2	1	2	1	1	0	0	0	0	1	0	1	1
54	kurunegala	34	2	1	1	4	6	2	0	2	0	0	0	1	0	0	0	0	0	2	1	3	3	99	3	2	2	1	1	1	2	0	0	1	0	0	0	0	0
55	hambanthota	40	2	1	1	3	4	2	0	3	1	0	0	0	0	1	0	0	0	14	1	3	3	3	1	2	1	1	2	1	1	0	0	1	1	1	1	1	1
56	hambanthota	29	2	2	1	3	6	2	0	7	0	0	0	0	1	0	0	0	0	3.25	1	3	3	3	3	2	2	1	1	1	2	0	0	1	0	0	0	0	0
57	hambanthota	28	2	1	1	3	5	2	0	4	0	0	0	0	0	0	1	0	0	4	1	1	3	2	1	2	2	1	1	1	3	1	1	1	1	1	1	1	1
58	badulla	42	1	1	3	3	1	2	0	5	1	0	0	0	0	0	0	1	0	5	2	3	3	2	3	2	2	1	2	1	2	0	0	0	0	1	0	1	0
59	badulla	34	2	1	1	3	4	2	0	3	1	0	0	0	0	0	0	0	0	2	1	3	3	3	3	2	1	1	2	1	1	0	0	0	0	0	0	0	0
60	badulla	52	2	1	1	4	1	2	0	1	0	1	0	0	0	0	0	0	0	6	1	3	3	3	3	2	2	1	1	1	1	0	0	1	0	0	0	0	0
61	badulla	53	1	1	1	3	1	2	0	2	0	0	0	1	0	0	0	0	0	7	1	3	3	3	3	2	1	1	1	1	1	1	0	1	0	1	0	1	1
62	badulla	61	1	1	1	3	1	2	0	2	0	0	0	1	0	0	0	0	0	21	1	3	3	3	3	2	1	1	1	1	1	1	0	1	0	1	0	1	1
63	badulla	42	1	2	1	5	1	1	48	1	0	1	1	0	0	0	0	0	0	19	2	2	3	2	2	2	2	2	2	1	2	1	0	1	0	1	1	1	1
64	negombo	38	1	1	1	4	4	2	0	5	1	0	0	0	0	0	0	1	0	10	1	1	1	3	1	2	1	1	1	1	1	0	0	1	0	0	1	0	0
65	negombo	41	2	1	1	3	2	2	0	3	0	0	0	0	0	1	0	0	0	6	1	3	3	2	2	2	2	1	1	1	2	0	0	1	0	0	0	0	0
66	balapitiya	40	2	1	1	3	1	2	0	2	0	0	0	1	0	0	0	0	0	2	99	3	3	2	3	2	2	1	2	1	2	0	0	1	0	1	1	1	0
67	kilinochchi	45	1	1	3	3	1	2	0	7	0	0	0	0	1	0	0	0	0	0.833333	1	2	3	3	3	2	2	1	2	1	1	0	0	0	0	1	0	0	1
68	colombo	36	2	3	1	3	4	1	48	2	0	0	0	1	0	0	0	0	0	8	1	3	3	99	2	2	2	1	1	1	2	1	1	1	0	0	1	0	1
69	colombo	34	2	1	1	5	4	2	0	2	0	0	0	1	0	0	0	1	0	6	1	3	3	1	2	2	1	1	1	1	1	1	1	1	0	0	0	0	1
70	colombo	29	1	1	1	3	4	1	9999	2	0	0	0	1	0	0	0	0	0	2	1	2	3	3	2	2	2	2	1	1	2	1	1	1	0	0	1	0	1
71	kaluthara	38	2	1	3	3	4	2	0	7	0	0	0	0	1	0	0	0	0	3	2	3	3	3	3	1	1	1	1	1	1	0	0	0	0	0	1	0	0
72	kaluthara	47	1	1	1	3	1	2	0	5	1	0	0	0	0	1	0	1	0	2	1	3	3	3	3	1	3	3	3	1	3	0	0	0	1	1	0	1	1
73	colombo	40	2	1	1	5	1	1	24	1	0	1	1	0	0	0	0	1	0	10	1	1	3	3	1	2	1	1	1	1	2	0	0	1	0	0	1	0	0
74	colombo	44	1	1	1	4	1	1	36	2	0	0	0	0	1	0	0	0	0	4	2	3	3	3	3	2	1	1	1	1	1	0	0	0	0	1	1	0	1
75	colombo	28	2	2	1	3	6	2	0	7	0	0	0	1	0	0	0	0	0	2.66667	1	3	3	3	3	2	1	1	1	1	1	0	0	1	0	0	1	0	1
76	colombo	36	2	1	1	5	4	1	24	2	0	0	0	1	0	0	0	1	0	9.66667	1	3	3	3	3	2	2	1	1	1	2	0	0	1	1	0	1	0	0
77	gampaha	45	1	1	1	4	6	2	0	7	0	0	0	0	1	0	0	1	0	4	2	3	3	3	3	2	1	1	1	1	1	0	1	0	1	0	1	0	0
78	colombo	28	1	1	3	3	3	2	0	2	0	0	0	1	0	0	0	0	0	1.75	1	3	3	2	1	2	1	1	1	1	2	1	0	1	0	0	0	0	0
79	colombo	26	2	2	1	3	4	2	0	2	0	0	0	1	0	0	0	0	0	1.75	1	3	3	3	3	2	1	1	1	1	2	0	0	1	0	0	1	0	1
80	colombo	28	1	1	3	3	4	99	9999	2	0	0	0	1	0	0	0	0	0	1.75	1	3	3	2	1	2	2	1	2	1	2	1	0	1	1	1	0	0	1
81	colombo	34	2	1	1	4	1	2	0	1	0	1	1	0	0	0	0	0	0	3	1	2	3	3	1	2	1	1	1	1	2	0	0	1	0	0	0	1	0
82	colombo	41	2	1	1	4	4	1	24	1	0	1	1	0	0	0	0	0	0	1.5	1	2	3	1	3	2	2	1	1	1	2	1	0	1	0	0	0	1	0
83	colombo	36	2	1	1	4	1	2	0	1	0	1	1	0	0	0	0	0	0	9999	1	2	3	3	3	2	2	1	1	1	1	0	1	0	0	0	0	1	1
84	colombo	36	2	1	1	4	1	2	0	1	0	1	0	0	0	0	0	0	0	2	1	2	3	2	3	2	2	1	1	1	2	1	1	1	1	0	0	1	0
85	colombo	37	2	1	1	5	4	2	0	1	0	1	1	0	0	0	0	0	0	6	1	3	3	3	3	2	2	1	1	1	2	0	0	1	1	1	1	1	1
86	mathara	59	1	1	1	5	1	2	0	1	0	1	0	0	0	0	0	0	0	1.66667	1	3	3	2	1	2	1	3	2	1	1	0	0	0	0	0	1	0	0
87	kurunegala	36	2	1	1	4	4	1	18	3	1	0	0	0	0	1	0	0	0	1	1	3	3	3	3	2	2	1	1	1	1	1	0	1	1	1	0	0	0
88	kurunegala	41	2	1	1	3	1	2	0	3	1	0	0	0	0	1	0	0	0	6	1	3	3	3	3	2	2	1	2	1	1	1	1	1	1	1	1	1	1
89	ragama	50	1	1	1	5	4	1	0	1	0	1	0	0	0	0	0	0	0	2	1	2	3	2	2	2	2	1	1	1	2	0	0	1	0	0	0	0	0
90	ragama	53	1	1	1	4	1	2	0	1	0	1	1	0	0	0	0	0	0	1.5	1	3	2	2	2	2	2	1	1	1	2	0	1	0	1	0	0	0	1
91	gampaha	49	2	1	1	3	1	2	0	5	1	0	0	0	0	0	0	1	0	9	1	3	3	3	3	2	1	1	2	1	1	0	0	0	0	0	1	1	1
92	gampaha	43	1	1	1	3	1	1	60	5	1	0	0	0	0	0	0	1	0	9	1	2	3	2	2	2	1	1	1	1	2	1	1	0	0	0	1	1	1
93	gampaha	56	2	1	1	4	1	1	72	1	0	1	0	0	0	0	0	0	0	1.5	1	3	3	3	3	2	1	1	3	1	1	1	1	0	1	1	0	0	0
94	kurunegala	55	2	1	1	4	1	2	0	1	0	1	1	0	0	0	0	0	0	2	2	1	3	3	3	2	2	2	2	1	1	0	0	1	0	1	1	1	0
95	kurunegala	54	2	1	1	3	1	2	0	3	1	0	0	0	0	1	1	0	0	14	2	3	3	2	3	2	2	2	2	1	1	0	0	1	0	1	0	0	1
96	kurunegala	49	2	1	1	3	1	1	18	3	1	0	0	0	0	1	1	1	0	11	1	2	3	3	3	2	2	2	2	1	1	0	0	1	1	1	0	0	0
97	kurunegala	999	2	1	1	4	1	2	0	4	0	0	0	0	0	0	1	0	0	5.5	2	3	3	2	3	2	2	1	2	1	1	0	0	0	0	0	0	0	0
98	colombo	29	2	2	1	4	2	1	9999	2	0	0	0	1	0	0	0	0	0	1.5	2	3	3	99	1	2	1	1	1	1	2	1	1	1	0	0	1	0	0
99	colombo	29	2	2	1	4	3	1	18	2	0	0	0	1	0	0	0	0	0	1.5	2	3	3	3	2	2	1	1	1	1	2	0	1	1	0	1	1	0	0
100	colombo	29	2	1	1	4	4	1	24	2	0	0	0	1	0	0	0	0	0	1.5	2	2	3	3	1	2	2	1	1	1	1	1	1	1	0	0	1	0	1
101	kaluthara	52	1	1	1	3	1	1	18	5	1	0	0	0	0	0	0	1	0	1.5	2	3	3	2	3	2	1	1	2	1	1	0	0	1	0	1	0	0	0
102	kaluthara	47	2	1	1	4	1	2	0	1	0	1	1	0	0	0	1	1	0	1.5	2	3	3	3	3	2	1	1	1	1	1	0	0	1	1	0	0	0	0
103	colombo	999	2	2	1	4	4	2	0	2	0	0	0	1	0	0	0	0	0	1.41667	2	3	3	2	1	2	1	1	1	1	2	0	0	1	0	1	1	0	0
104	colombo	37	2	1	1	4	4	2	0	2	0	0	0	1	0	0	0	0	0	2.58333	2	3	3	2	1	2	2	1	2	1	2	1	0	1	1	1	1	0	1
105	colombo	37	2	1	1	4	1	2	0	1	0	1	0	0	0	0	0	0	0	1.33333	1	1	3	3	3	2	3	1	1	1	2	1	1	0	1	0	1	1	0
106	kilinochchi	36	1	1	3	4	1	2	0	1	1	1	1	0	0	0	0	1	0	1.33333	1	3	3	3	3	2	2	1	1	1	1	0	0	1	0	0	0	0	1
107	kurunegala	45	2	1	1	3	1	2	0	7	0	0	0	0	1	0	0	0	0	9	1	3	3	99	3	2	2	1	1	1	2	0	0	1	0	0	0	0	0
108	colombo	39	2	1	1	5	4	1	12	1	0	1	1	0	0	0	0	0	0	1.5	1	1	3	3	3	2	2	1	1	1	2	0	0	0	1	1	0	1	1
109	colombo	42	1	1	1	4	1	1	48	1	0	1	1	0	0	0	0	0	0	1.41667	1	2	3	3	3	2	2	1	1	1	1	1	1	0	1	0	1	1	1
110	colombo	48	1	1	1	4	1	2	0	1	0	1	0	0	0	0	0	0	0	1	2	1	3	1	1	2	2	1	1	1	1	0	1	1	1	1	0	0	0
111	colombo	42	2	1	1	5	1	2	0	1	0	0	0	1	0	0	0	0	0	6	2	1	3	1	1	2	2	1	2	1	2	0	0	1	1	1	0	0	0
112	kurunegala	52	2	1	1	4	4	2	0	1	0	1	1	0	0	0	0	0	0	5	2	3	3	3	3	2	2	1	2	1	1	0	0	1	0	0	0	1	1
113	badulla	40	1	1	1	3	6	2	0	3	0	0	0	0	0	1	0	0	0	4	1	2	99	3	2	2	2	1	1	1	2	0	0	1	0	0	0	0	0
114	galle	42	2	1	1	3	4	1	36	3	1	0	0	0	0	1	0	1	0	10	2	3	3	2	1	2	2	1	1	1	1	0	0	0	0	1	1	0	0
115	panadura	51	1	1	1	4	4	1	36	1	1	1	1	0	0	0	0	1	0	2	1	3	3	3	3	2	1	1	2	1	1	0	0	1	0	1	1	1	0
116	negombo	55	1	1	1	5	5	1	12	1	0	1	1	0	0	0	0	1	0	20.0833	1	1	1	2	1	2	1	1	1	1	2	1	1	1	0	0	1	0	1
117	hambanthota	46	1	1	1	4	1	1	12	1	0	1	0	0	0	0	0	0	0	10	1	3	3	3	3	2	1	1	2	1	1	0	0	0	0	1	0	1	1
118	colombo	28	1	2	1	3	4	2	0	5	1	0	0	0	0	0	0	0	0	1.41667	1	3	3	3	3	2	1	1	1	1	1	0	0	1	1	1	0	1	0
119	colombo	36	2	1	1	4	4	2	0	2	0	0	0	1	0	0	0	0	0	2	2	3	3	2	2	2	1	2	2	1	2	0	1	1	0	1	1	1	0
120	gampaha	32	1	1	1	3	4	1	72	2	0	0	0	1	0	0	0	0	0	1	2	1	2	1	1	2	2	3	3	3	2	1	1	1	1	1	1	0	0
121	gampaha	49	2	1	1	3	4	1	12	3	0	0	0	0	0	1	0	0	0	1	1	2	3	3	1	2	1	1	1	1	1	1	0	1	0	0	0	0	0
122	ampara	43	1	1	1	4	3	1	48	1	0	1	1	0	0	0	0	0	0	2	1	3	1	3	3	2	2	1	1	1	2	1	1	1	1	1	1	0	1
123	ampara	28	2	1	1	3	3	2	0	3	1	0	0	0	0	1	1	1	0	4	1	2	3	2	1	2	1	1	1	1	2	0	0	1	0	0	1	0	0
124	matale	31	1	1	1	3	2	1	12	5	1	0	0	0	0	0	0	0	0	1	2	3	3	3	3	2	1	1	1	1	1	0	0	0	0	0	0	0	0
125	matale	44	2	1	1	4	4	2	0	3	1	0	0	0	0	1	1	0	0	6	2	2	3	1	1	2	2	1	1	1	2	0	0	0	0	0	0	0	1
126	hambanthota	62	1	1	1	3	4	2	0	5	1	0	0	0	0	0	0	1	1	2.5	1	2	1	3	3	2	2	1	2	1	1	0	0	1	0	1	1	0	0
127	hambanthota	32	2	1	1	3	4	2	0	3	1	0	0	0	0	1	0	0	0	1	2	3	3	3	1	2	2	1	2	1	2	1	1	1	1	1	1	1	1
128	kilinochchi	29	2	1	1	3	4	1	12	3	1	0	0	0	0	1	0	0	0	2.66667	1	3	3	3	3	1	1	1	2	1	1	0	0	1	0	1	1	1	0
129	rathnapura	51	1	1	1	4	4	2	0	1	0	1	0	0	0	0	0	0	0	2	2	2	99	2	3	2	2	1	1	1	2	0	1	0	0	0	0	0	0
130	negombo	53	2	1	1	2	1	2	0	3	0	0	0	0	0	1	0	0	0	20	1	2	2	2	1	2	1	2	2	1	1	0	0	1	0	0	1	0	0
131	galle	43	2	1	1	3	4	2	0	7	0	0	0	0	1	0	0	0	0	5	1	3	3	3	3	2	2	1	1	1	1	0	0	0	0	0	1	0	0
132	galle	40	2	1	1	4	4	2	0	2	0	0	0	1	0	0	0	0	0	8	1	3	3	3	3	2	1	1	1	1	1	1	1	1	0	1	1	1	1
133	galle	42	2	1	1	3	1	2	0	7	0	0	0	0	1	0	0	0	0	9999	1	3	3	3	3	2	2	1	1	1	1	0	0	1	0	0	1	0	0
134	galle	38	1	1	1	3	4	1	36	3	1	0	0	0	0	1	0	1	0	2	1	3	3	2	1	2	2	1	1	1	1	0	0	0	0	1	1	0	0
135	mullativ	41	1	1	3	3	1	2	0	5	1	0	0	0	0	0	0	1	0	5	1	2	1	3	3	2	2	1	1	1	2	1	1	1	1	1	1	1	1
136	jaffna	26	2	1	3	3	4	2	0	2	0	0	0	1	0	0	0	0	0	4	1	3	3	3	3	1	1	1	1	1	1	0	0	0	0	1	0	0	0
137	jaffna	32	2	1	3	3	4	2	0	7	0	0	0	0	1	0	0	0	0	5	1	3	3	3	3	2	1	1	1	1	1	0	0	0	0	1	0	0	1
138	jaffna	50	1	1	3	5	1	2	0	5	1	0	0	0	0	0	0	1	0	15.5833	2	2	3	3	1	1	2	2	2	1	3	0	1	0	1	1	0	0	1
139	ampara	27	2	1	3	3	2	1	12	7	0	0	0	0	1	0	0	0	0	0.75	1	3	3	3	3	2	1	1	1	1	1	0	0	0	0	0	1	0	0
140	mannar	46	1	1	3	3	1	2	0	5	1	0	0	0	0	0	0	1	0	4.33333	1	2	1	3	3	2	2	1	2	1	1	0	0	1	1	1	0	0	0
141	mannar	29	2	1	3	3	4	2	0	7	0	0	0	0	1	0	0	0	0	0.833333	1	2	2	3	3	2	2	1	1	1	1	0	0	1	1	1	0	0	0
142	vavniya	30	2	1	3	3	4	2	0	7	0	0	0	0	1	0	0	0	0	0.833333	99	2	2	2	2	3	3	3	3	3	3	0	0	0	0	0	0	0	0
143	mathara	28	2	2	1	3	4	2	0	4	0	0	0	0	0	0	1	0	0	0.916667	2	3	3	3	3	2	2	1	1	1	1	0	0	1	0	1	0	0	0
144	colombo	41	1	2	1	5	1	1	60	1	0	1	1	0	0	0	0	0	0	15	2	2	1	3	2	2	2	2	2	1	1	1	1	1	1	1	1	1	1
145	colombo	39	1	1	1	4	4	1	96	1	0	1	1	0	0	0	0	0	0	0.833333	1	3	3	3	3	2	2	1	1	1	2	0	0	1	0	0	0	1	1
146	mathara	39	2	1	1	3	4	2	0	3	0	0	0	0	0	1	0	0	0	0.833333	2	3	3	3	3	2	1	1	2	1	1	0	1	1	0	1	0	0	0
147	gampaha	40	2	1	1	2	4	2	0	3	1	0	0	0	0	1	1	0	0	0.833333	1	3	3	3	3	2	2	2	2	1	2	0	0	1	0	1	0	1	0
148	badulla	27	1	2	1	3	1	2	0	7	0	0	0	0	1	0	0	0	0	0.833333	1	3	3	3	3	2	1	1	1	1	1	0	0	1	1	1	0	0	0
149	colombo	32	2	1	1	5	3	2	0	1	0	1	1	0	0	0	0	0	0	1	1	1	3	3	1	2	2	1	1	1	2	1	1	1	1	1	1	1	1
150	colombo	40	1	2	1	5	1	2	0	1	0	1	1	0	0	0	0	0	0	9.91667	1	1	1	3	3	2	2	2	2	1	2	0	1	1	0	0	0	1	1
151	colombo	35	1	2	1	5	1	1	36	1	0	1	1	0	0	0	0	0	1	5	2	3	3	3	3	2	2	1	2	1	2	1	0	1	1	1	0	0	1
152	colombo	52	2	1	1	4	6	1	24	1	0	1	1	0	0	0	0	0	0	17	1	3	1	3	3	2	1	1	1	1	1	0	0	1	1	1	1	1	0
153	kurunegala	54	2	1	1	4	4	2	0	1	0	1	1	0	0	0	0	0	0	0.666667	2	3	1	3	3	2	2	1	1	1	2	0	0	1	0	0	1	1	0
154	balapitiya	57	1	1	1	4	6	1	36	1	0	1	0	0	0	0	0	0	0	0.666667	1	3	3	3	3	2	2	3	1	1	1	0	0	1	0	0	0	1	0
155	colombo	32	2	1	1	4	4	1	6	4	0	0	0	0	0	0	1	0	0	0.666667	1	3	3	1	3	2	1	1	1	1	1	0	1	1	0	0	0	0	0
156	colombo	35	1	1	1	4	4	1	36	1	0	1	1	0	0	0	0	0	0	0.5	1	2	3	3	3	2	2	1	1	1	1	0	1	1	1	0	1	1	1
157	colombo	32	2	1	1	4	1	1	6	1	0	1	1	0	0	0	0	0	0	0.5	1	1	2	3	3	2	1	1	1	1	1	0	0	1	0	0	0	0	0
158	colombo	36	2	1	1	5	4	2	0	1	0	1	0	0	0	0	0	0	0	2	1	1	2	3	3	2	2	1	1	1	2	1	0	1	0	0	0	0	1
159	panadura	54	2	1	1	3	1	1	12	3	1	0	0	0	0	0	0	0	0	1	2	2	3	2	3	2	1	2	2	1	1	1	0	0	1	0	1	0	0
160	balapitiya	53	1	1	1	5	2	2	0	1	1	1	1	1	1	1	1	1	0	4	2	3	3	3	3	1	1	1	2	1	1	1	1	1	1	1	0	1	0
161	hambanthota	41	2	1	1	3	4	2	0	3	1	0	0	0	0	1	0	0	0	0.333333	2	3	3	3	3	2	2	1	2	1	2	0	0	0	0	1	0	0	0
162	colombo	34	2	1	1	5	1	2	0	1	0	1	1	0	0	0	0	0	0	1	1	1	3	1	3	2	2	1	1	1	2	0	1	1	1	1	0	1	1
163	ragama	30	2	1	1	4	4	2	0	4	0	0	0	0	0	0	1	0	0	1.5	2	3	3	3	3	2	1	1	2	1	1	0	0	1	0	0	0	0	0
164	ampara	40	1	1	1	4	1	1	3	1	0	1	1	0	0	0	0	0	0	1.5	1	2	3	2	3	2	1	1	1	1	2	0	0	1	0	0	1	0	0
165	badulla	45	1	1	1	4	4	2	0	1	0	1	0	0	0	0	0	0	0	0.25	1	3	3	3	3	2	1	1	1	1	2	0	1	1	0	0	0	0	0
166	colombo	38	2	1	1	4	4	1	3	4	0	0	0	0	0	0	1	0	0	7.5	2	3	3	3	3	2	1	1	1	1	1	0	0	1	0	0	0	0	1
167	panadura	55	2	1	1	3	1	1	60	3	1	0	0	0	0	1	1	0	0	0.208333	1	3	3	3	3	2	1	2	2	3	2	0	0	1	0	1	1	0	0
168	colombo	33	2	1	1	5	4	1	6	1	0	1	1	0	0	0	0	0	1	5	2	1	3	1	1	2	2	1	2	1	2	1	1	1	0	1	1	1	1
169	badulla	29	2	1	1	4	4	1	2	3	1	0	0	0	0	0	0	0	0	0.166667	2	3	3	3	3	2	1	1	2	1	1	0	0	1	0	0	0	0	0
170	ragama	25	1	3	1	3	4	2	0	5	1	0	0	0	0	0	0	0	0	2	1	3	1	3	2	2	1	1	3	2	1	0	0	1	0	0	0	0	0
171	rathnapura	51	1	1	2	4	1	1	1	1	0	1	0	0	0	0	0	0	0	1.5	2	1	2	3	1	2	2	2	2	1	2	0	0	0	0	1	1	1	1
172	kilinochchi	26	2	1	1	3	1	2	0	3	1	0	0	0	0	0	0	0	0	0.07	99	3	3	3	3	2	1	1	3	1	1	0	0	0	0	1	0	0	0
173	balapitiya	41	2	1	1	4	4	1	6	5	1	0	0	0	0	1	1	1	0	0.0833333	2	3	3	3	3	2	1	1	2	1	1	0	0	0	0	1	1	0	1
